# Supplementary material
Source: MDPI journal article supplement (https://www.mdpi.com/2072-4292/14/10/2358)
Supplement: s1 [file s1]

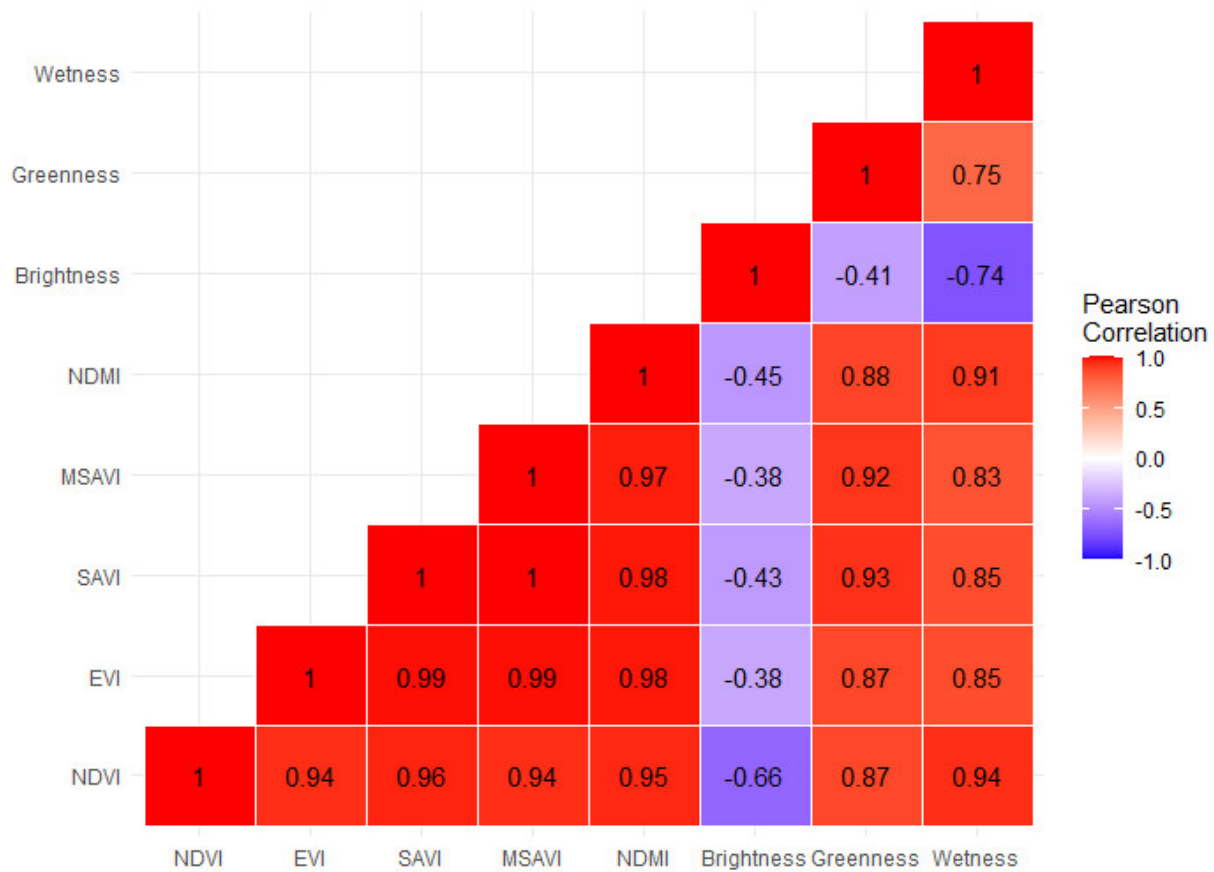

**Figure S1.** Matrix of vegetation index correlation coefficients.

**Table S1.** Model outputs for vegetation index-total understorey biomass GLMMs ( $\epsilon_i$  = residual error).

| Model                                 | AIC     | $\Delta$ AIC | VIF explanatory variables | R <sup>2</sup> m | R <sup>2</sup> c | DF | Akaike weight |
|---------------------------------------|---------|--------------|---------------------------|------------------|------------------|----|---------------|
| Greenness + $\epsilon_i$              | 4636.27 | 0            | -                         | 0.026            | 0.897            | 4  | 0.8594        |
| Brightness + Greenness + $\epsilon_i$ | 4639.89 | 3.62         | 1.31, 1.31                | 0.026            | 0.897            | 5  | 0.1406        |
| SAVI + $\epsilon_i$                   | 4693.72 | 57.45        | -                         | 0.012            | 0.881            | 4  | 2.8778E-13    |
| MSAVI + $\epsilon_i$                  | 4696.16 | 59.89        | -                         | 0.012            | 0.880            | 4  | 8.4963E-14    |
| Brightness + SAVI + $\epsilon_i$      | 4696.32 | 60.05        | 1.48, 1.48                | 0.013            | 0.882            | 5  | 7.843E-14     |
| Brightness + MSAVI + $\epsilon_i$     | 4696.33 | 60.06        | 1.39, 1.39                | 0.013            | 0.882            | 5  | 7.8039E-14    |
| NDVI + $\epsilon_i$                   | 4700.51 | 64.24        | -                         | 0.012            | 0.881            | 4  | 9.6524E-15    |
| Brightness + NDVI + $\epsilon_i$      | 4707.18 | 70.91        | 2.3, 2.3                  | 0.012            | 0.880            | 5  | 3.4377E-16    |
| Brightness + EVI + $\epsilon_i$       | 4716.97 | 80.7         | 1.32, 1.32                | 0.011            | 0.879            | 5  | 2.5727E-18    |
| EVI + $\epsilon_i$                    | 4724.17 | 87.9         | -                         | 0.009            | 0.877            | 4  | 7.0296E-20    |
| Brightness + NDMI + $\epsilon_i$      | 4726.97 | 90.7         | 1.41, 1.41                | 0.011            | 0.879            | 5  | 1.7335E-20    |
| NDMI + $\epsilon_i$                   | 4732.87 | 96.6         | -                         | 0.009            | 0.877            | 4  | 9.073E-22     |
| Wetness + $\epsilon_i$                | 4753.63 | 117.36       | -                         | 0.007            | 0.875            | 4  | 2.8169E-26    |
| Brightness + $\epsilon_i$             | 4760.06 | 123.79       | -                         | 0.008            | 0.873            | 4  | 1.1311E-27    |

**Table S2.** Model outputs for vegetation index-live understorey biomass GLMMs ( $\epsilon_i$  = residual error).

| Model                                 | AIC     | $\Delta$ AIC | VIF explanatory variables | R <sup>2</sup> m | R <sup>2</sup> c | DF | Akaike weight |
|---------------------------------------|---------|--------------|---------------------------|------------------|------------------|----|---------------|
| Brightness + MSAVI + $\epsilon_i$     | 3880.98 | 0            | 1.24, 1.24                | 0.441            | 0.715            | 5  | 0.8839        |
| Brightness + SAVI + $\epsilon_i$      | 3885.04 | 4.06         | 1.3, 1.3                  | 0.437            | 0.718            | 5  | 0.1161        |
| Brightness + NDVI + $\epsilon_i$      | 3942.61 | 61.63        | 1.99, 1.99                | 0.418            | 0.690            | 5  | 3.6612E-14    |
| Brightness + EVI + $\epsilon_i$       | 3982.61 | 101.63       | 1.16, 1.16                | 0.407            | 0.671            | 5  | 7.5463E-23    |
| Brightness + Greenness + $\epsilon_i$ | 3989.84 | 108.86       | 1.26, 1.26                | 0.406            | 0.761            | 5  | 2.0312E-24    |
| Brightness + NDMI + $\epsilon_i$      | 4016.79 | 135.81       | 1.23, 1.23                | 0.382            | 0.675            | 5  | 2.8552E-30    |
| MSAVI + $\epsilon_i$                  | 4057.41 | 176.43       | -                         | 0.375            | 0.651            | 4  | 4.3164E-39    |
| EVI + $\epsilon_i$                    | 4085.80 | 204.82       | -                         | 0.363            | 0.636            | 4  | 2.9533E-45    |
| SAVI + $\epsilon_i$                   | 4100.44 | 219.46       | -                         | 0.358            | 0.640            | 4  | 1.9556E-48    |
| Greenness + $\epsilon_i$              | 4149.60 | 268.62       | -                         | 0.362            | 0.716            | 4  | 4.1335E-59    |
| NDMI + $\epsilon_i$                   | 4152.19 | 271.21       | -                         | 0.331            | 0.628            | 4  | 1.1322E-59    |
| NDVI + $\epsilon_i$                   | 4343.04 | 462.06       | -                         | 0.247            | 0.500            | 4  | 4.0865E-101   |
| Wetness + $\epsilon_i$                | 4505.91 | 624.93       | -                         | 0.15             | 0.391            | 4  | 1.7562E-136   |
| Brightness + $\epsilon_i$             | 4656.05 | 775.07       | -                         | 0.00             | 0.132            | 4  | 4.3863E-169   |

**Table S3.** Model outputs for vegetation index-grass biomass GLMMs ( $\epsilon_i$  = residual error).

| Model                                 | AIC     | $\Delta$ AIC | VIF explanatory variables | R <sup>2</sup> m | R <sup>2</sup> c | DF | Akaike weight |
|---------------------------------------|---------|--------------|---------------------------|------------------|------------------|----|---------------|
| Brightness + Greenness + $\epsilon_i$ | 5154.42 | 0            | 1.31, 1.31                | 0.016            | 0.878            | 5  | 0.8753        |
| Brightness + $\epsilon_i$             | 5158.63 | 4.21         | -                         | 0.014            | 0.872            | 4  | 0.1067        |
| Brightness + NDMI + $\epsilon_i$      | 5165.23 | 10.81        | 1.41, 1.41                | 0.014            | 0.871            | 5  | 0.0039        |
| Brightness + MSAVI + $\epsilon_i$     | 5165.25 | 10.83        | 1.39, 1.39                | 0.014            | 0.872            | 5  | 0.0039        |
| Brightness + SAVI + $\epsilon_i$      | 5165.29 | 10.87        | 1.48, 1.48                | 0.014            | 0.872            | 5  | 0.0038        |
| Brightness + NDVI + $\epsilon_i$      | 5165.32 | 10.90        | 2.3, 2.3                  | 0.014            | 0.872            | 5  | 0.0038        |
| Brightness + EVI + $\epsilon_i$       | 5166.02 | 11.60        | 1.32, 1.32                | 0.014            | 0.872            | 5  | 0.0027        |
| NDVI + $\epsilon_i$                   | 5204.28 | 49.86        | -                         | 0.006            | 0.866            | 4  | 1.3037E-11    |
| Greenness + $\epsilon_i$              | 5204.89 | 50.47        | -                         | 0.010            | 0.872            | 4  | 9.6102E-12    |
| Wetness + $\epsilon_i$                | 5215.61 | 61.19        | -                         | 0.006            | 0.864            | 4  | 4.5177E-14    |
| SAVI + $\epsilon_i$                   | 5225.65 | 71.23        | -                         | 0.004            | 0.862            | 4  | 2.9837E-16    |
| MSAVI + $\epsilon_i$                  | 5229.49 | 75.07        | -                         | 0.004            | 0.861            | 4  | 4.3743E-17    |
| EVI + $\epsilon_i$                    | 5241.28 | 86.86        | -                         | 0.003            | 0.859            | 4  | 1.2043E-19    |
| NDMI + $\epsilon_i$                   | 5243.62 | 89.20        | -                         | 0.002            | 0.859            | 4  | 3.7378E-20    |

**Table S4.** Model outputs for vegetation index-total understorey biomass GLMMs with additional variables (S.M. = soil moisture (1-month window + 2-week lag), Tree C. = percentage tree cover, Dom. G.F. = dominant understorey growth form,  $\epsilon_i$  = residual error).

| Model                                                       | AIC     | $\Delta$ AIC | VIF explanatory variables | R <sup>2</sup> m | R <sup>2</sup> c | DF | Akaike weight |
|-------------------------------------------------------------|---------|--------------|---------------------------|------------------|------------------|----|---------------|
| Greenness + S.M. + Tree C.<br>+<br>Dom. G.F. + $\epsilon_i$ | 4626.75 | 0            | 1.22, 1.16, 1.01,<br>1.06 | 0.428            | 0.881            | 9  | 0.6399        |
| Brightness + Greenness + $\epsilon_i$                       | 4627.9  | 1.15         | 1.8, 2.05, 1.58,          | 0.433            | 0.88             | 10 | 0.3601        |

|                                                                   |         |       |                              |       |       |    |                |  |
|-------------------------------------------------------------------|---------|-------|------------------------------|-------|-------|----|----------------|--|
| S.M. + Tree C. + Dom. G.F.<br>+ $\epsilon i$                      |         |       | 1.01, 1.07                   |       |       |    |                |  |
| Brightness + MSAVI + S.M.<br>+ Tree C. + Dom. G.F. + $\epsilon i$ | 4663.93 | 37.18 | 1.65, 1.66, 1.2,<br>1, 1.08  | 0.442 | 0.873 | 10 | 5.4024<br>E-09 |  |
| Brightness + SAVI + S.M. +<br>Tree C. + Dom. G.F. + $\epsilon i$  | 4664.32 | 37.57 | 1.76, 1.77, 1.21,<br>1, 1.07 | 0.441 | 0.873 | 10 | 4.4453<br>E-09 |  |
| NDVI + S.M. + Tree C. +<br>Dom. G.F. + $\epsilon i$               | 4666.39 | 39.64 | 1.05, 1.01, 1,<br>1.06       | 0.438 | 0.873 | 9  | 1.5791<br>E-09 |  |
| Brightness + NDVI + S.M. +<br>Tree C. + Dom. G.F. + $\epsilon i$  | 4668.33 | 41.58 | 2.7, 2.64, 1.16,<br>1, 1.07  | 0.442 | 0.872 | 10 | 5.9861<br>E-10 |  |
| Brightness + EVI + S.M. +<br>Tree C. + Dom. G.F. + $\epsilon i$   | 4671.26 | 44.51 | 1.47, 1.46, 1.12,<br>1, 1.08 | 0.444 | 0.872 | 10 | 1.3832<br>E-10 |  |
| SAVI + S.M. + Tree C. +<br>Dom. G.F. + $\epsilon i$               | 4674.71 | 47.96 | 1.08, 1.03, 1,<br>1.07       | 0.433 | 0.874 | 9  | 2.4646<br>E-11 |  |
| Brightness + NDMI + S.M.<br>+ Tree C. + Dom. G.F. + $\epsilon i$  | 4678.01 | 51.26 | 1.58, 1.56, 1.12,<br>1, 1.07 | 0.444 | 0.871 | 10 | 4.7332<br>E-12 |  |
| MSAVI + S.M. + Tree C. +<br>Dom. G.F. + $\epsilon i$              | 4678.17 | 51.42 | 1.08, 1.03, 1,<br>1.07       | 0.432 | 0.874 | 9  | 4.3693<br>E-12 |  |
| Brightness + S.M. +<br>Tree C. + Dom. G.F. + $\epsilon i$         | 4688.67 | 61.92 | 1.07, 1.07, 1,<br>1.02       | 0.453 | 0.867 | 9  | 2.2928<br>E-14 |  |
| Wetness + S.M. + Tree C. +<br>Dom. G.F. + $\epsilon i$            | 4689.06 | 62.31 | 1.11, 1.08, 1,<br>1.06       | 0.441 | 0.871 | 9  | 1.8866<br>E-14 |  |
| EVI + S.M. + Tree C. +<br>Dom. G.F. + $\epsilon i$                | 4697.63 | 70.88 | 1.06, 1.01, 1,<br>1.07       | 0.433 | 0.872 | 9  | 2.5985<br>E-16 |  |
| NDMI + S.M. + Tree C. +<br>Dom. G.F. + $\epsilon i$               | 4703.38 | 76.63 | 1.06, 1.01, 1,<br>1.07       | 0.433 | 0.871 | 9  | 1.4660<br>E-17 |  |

**Table S5.** Model outputs for vegetation index-live understorey biomass GLMMs with additional variables (S.M. = soil moisture (1-month window + 2-week lag), Tree C. = percentage tree cover, Dom. G.F. = dominant understorey growth form,  $\epsilon i$  = residual error).

| Model                                                            | AIC     | $\Delta$ AIC | VIF explanatory variables       | R <sup>2</sup> m | R <sup>2</sup> c | DF | Akaike weight |
|------------------------------------------------------------------|---------|--------------|---------------------------------|------------------|------------------|----|---------------|
| EVI + S.M. + Tree C. +<br>Dom. G.F. + $\epsilon i$               | 3538.29 | 0            | 2.57, 2.62, 1.03,<br>1.1        | 0.602            | 0.746            | 9  | 0.2688        |
| MSAVI + S.M. + Tree C. +<br>Dom. G.F. + $\epsilon i$             | 3538.58 | 0.29         | 2.77, 2.82, 1.03,<br>1.1        | 0.602            | 0.746            | 9  | 0.2325        |
| NDMI + S.M. + Tree C. +<br>Dom. G.F. + $\epsilon i$              | 3538.82 | 0.53         | 2.26, 2.31, 1.03,<br>1.1        | 0.600            | 0.748            | 9  | 0.2062        |
| SAVI + S.M. + Tree C. +<br>Dom. G.F. + $\epsilon i$              | 3539.31 | 1.02         | 2.55, 2.6, 1.03,<br>1.1         | 0.602            | 0.747            | 9  | 0.1614        |
| Wetness + S.M. + Tree C. +<br>Dom. G.F. + $\epsilon i$           | 3541.42 | 3.13         | 1.26, 1.32, 1.04,<br>1.09       | 0.602            | 0.748            | 9  | 0.0562        |
| NDVI + S.M. + Tree C. +<br>Dom. G.F. + $\epsilon i$              | 3542.04 | 3.75         | 1.64, 1.69, 1.03,<br>1.09       | 0.602            | 0.747            | 9  | 0.0412        |
| Brightness + EVI + S.M. +<br>Tree C. + Dom. G.F. + $\epsilon i$  | 3544.27 | 5.98         | 1.53, 3.85, 3.38,<br>1.03, 1.11 | 0.602            | 0.746            | 10 | 0.0135        |
| Brightness + NDMI + S.M. +<br>Tree C. + Dom. G.F. + $\epsilon i$ | 3544.59 | 6.30         | 1.7, 3.77, 3.12,<br>1.04, 1.11  | 0.600            | 0.748            | 10 | 0.0115        |

|                                                           |         |      |                          |       |       |   |        |
|-----------------------------------------------------------|---------|------|--------------------------|-------|-------|---|--------|
| Greenness + S.M. + Tree C. +<br>Dom. G.F. + $\epsilon_i$  | 3546.22 | 7.93 | 2.68, 2.66, 1.1,<br>1.1  | 0.601 | 0.745 | 9 | 0.0051 |
| Brightness + S.M. +<br>Tree C. + Dom. G.F. + $\epsilon_i$ | 3546.93 | 8.64 | 1.02, 1.08, 1.03,<br>1.1 | 0.603 | 0.747 | 9 | 0.0036 |

**Table S6.** Model outputs for vegetation index-grass biomass GLMMs with additional variables (S.M. = soil moisture (1-month window + 2-week lag), Tree C. = percentage tree cover, Dom. G.F. = dominant understorey growth form,  $\epsilon_i$  = residual error).

| Model                                                                 | AIC     | $\Delta$ AIC | VIF explanatory variables      | R <sup>2</sup> m | R <sup>2</sup> c | DF | Akaike weight  |
|-----------------------------------------------------------------------|---------|--------------|--------------------------------|------------------|------------------|----|----------------|
| Brightness + Greenness + S.M. +<br>Tree C. + Dom. G.F. + $\epsilon_i$ | 4760.12 | 0            | 1.8, 2.05, 1.58,<br>1.01, 1.07 | 0.483            | 0.890            | 10 | 0.9998         |
| Brightness + S.M. +<br>Tree C. + Dom. G.F. + $\epsilon_i$             | 4778.55 | 18.43        | 1.07, 1.07, 1,<br>1.02         | 0.495            | 0.884            | 9  | 9.9519<br>E-05 |
| Brightness + MSAVI + S.M. +<br>Tree C. + Dom. G.F. + $\epsilon_i$     | 4781.8  | 21.68        | 1.65, 1.66, 1.2,<br>1, 1.08    | 0.491            | 0.886            | 10 | 1.9596<br>E-05 |
| Brightness + SAVI + S.M. +<br>Tree C. + Dom. G.F. + $\epsilon_i$      | 4782.07 | 21.95        | 1.76, 1.77, 1.21,<br>1, 1.07   | 0.491            | 0.886            | 10 | 1.7122<br>E-05 |
| Greenness + S.M. + Tree C. +<br>Dom. G.F. + $\epsilon_i$              | 4783.06 | 22.94        | 1.22, 1.16, 1.01,<br>1.06      | 0.472            | 0.892            | 9  | 1.0437<br>E-05 |
| Brightness + NDVI + S.M. +<br>Tree C. + Dom. G.F. + $\epsilon_i$      | 4783.44 | 23.32        | 2.7, 2.64, 1.16,<br>1, 1.07    | 0.492            | 0.885            | 10 | 8.6309<br>E-06 |
| Brightness + EVI + S.M. +<br>Tree C. + Dom. G.F. + $\epsilon_i$       | 4784.35 | 24.23        | 1.47, 1.46, 1.12,<br>1, 1.08   | 0.493            | 0.885            | 10 | 5.4759<br>E-06 |
| Brightness + NDMI + S.M. +<br>Tree C. + Dom. G.F. + $\epsilon_i$      | 4785.77 | 25.65        | 1.58, 1.56, 1.12,<br>1, 1.07   | 0.494            | 0.884            | 10 | 2.6922<br>E-06 |
| NDVI + S.M. + Tree C. +<br>Dom. G.F. + $\epsilon_i$                   | 4812.19 | 52.07        | 1.05, 1.01, 1,<br>1.06         | 0.481            | 0.886            | 9  | 4.9326<br>E-12 |
| Wetness + S.M. + Tree C. +<br>Dom. G.F. + $\epsilon_i$                | 4828.73 | 68.61        | 1.11, 1.08, 1,<br>1.06         | 0.484            | 0.884            | 9  | 1.2632<br>E-15 |
| SAVI + S.M. + Tree C. +<br>Dom. G.F. + $\epsilon_i$                   | 4830.92 | 70.8         | 1.08, 1.03, 1,<br>1.07         | 0.477            | 0.886            | 9  | 4.2258<br>E-16 |
| MSAVI + S.M. + Tree C. +<br>Dom. G.F. + $\epsilon_i$                  | 4835.4  | 75.28        | 1.08, 1.03, 1,<br>1.07         | 0.477            | 0.885            | 9  | 4.4987<br>E-17 |
| EVI + S.M. + Tree C. +<br>Dom. G.F. + $\epsilon_i$                    | 4854.36 | 94.24        | 1.06, 1.01, 1,<br>1.07         | 0.478            | 0.883            | 9  | 3.4354<br>E-21 |
| NDMI + S.M. + Tree C. +<br>Dom. G.F. + $\epsilon_i$                   | 4858.13 | 98.01        | 1.06, 1.01, 1,<br>1.07         | 0.479            | 0.883            | 9  | 5.2159<br>E-22 |

**Table S7.** Management models with coefficients. GLMMs trained using all seasons' (training and validation) data.

| Biomass type      | GLMM                                                                                                                          |
|-------------------|-------------------------------------------------------------------------------------------------------------------------------|
| Total understorey | 10.623 + 26.386(greenness) + 0.002(soil moisture) + -0.038(tree cover) + $\sigma_{\text{site}} = 1.635$                       |
| Live understorey  | 4.143 + 4.289(EVI) + 0.340(soil moisture) + -0.007(tree cover) + $\sigma_{\text{site}} = 1.454$                               |
| Grass             | 10.710 + -4.029(brightness) + 21.974(greenness) + -0.001(soil moisture) + -0.041(tree cover) + $\sigma_{\text{site}} = 1.684$ |
